# Supplementary material for: Hydrodeoxygenation of fatty acid esters catalyzed by Ni on nano-sized MFI type zeolites
Source: Royal Society of Chemistry journal article supplement (doi:10.1039/c6cy01598k), 2016-01-01
Supplement: c6cy01598k1.pdf [file c6cy01598k1.pdf]

## SUPPORTING INFORMATION

### **Hydrodeoxygenation of fatty acid esters catalyzed by Ni on nano-sized MFI type zeolites**

Moritz W. Schreiber, Daniella Rodriguez-Niño, Oliver Y. Gutiérrez\*, and Johannes A. Lercher\*

*TU München, Department of Chemistry and Catalysis Research Center, Lichtenbergstrasse 4,  
D-84747 Garching, Germany*

\*Corresponding authors:

[Oliver.Gutierrez@mytum.de](mailto:Oliver.Gutierrez@mytum.de)

Tel. 0049 89 28912827, Fax 0049 89 28913544

[Johannes.Lercher@ch.tum.de](mailto:Johannes.Lercher@ch.tum.de)

Tel. 0049 89 28913540, Fax 0049 89 28913544

**Table S1:** Fatty acid composition in triglyceride mixture of microalgae oil

| Fatty acid composition [wt%] |                   |                   |                   |                   |                   |                   |                   |                   |                   |                   |                   |        |
|------------------------------|-------------------|-------------------|-------------------|-------------------|-------------------|-------------------|-------------------|-------------------|-------------------|-------------------|-------------------|--------|
| C <sub>14:0</sub>            | C <sub>16:0</sub> | C <sub>18:2</sub> | C <sub>18:1</sub> | C <sub>18:0</sub> | C <sub>20:4</sub> | C <sub>20:0</sub> | C <sub>22:6</sub> | C <sub>22:4</sub> | C <sub>22:1</sub> | C <sub>22:0</sub> | C <sub>24:0</sub> | Sterol |
| 0.04                         | 4.41              | 56.2              | 32.2              | 4.41              | 0.07              | 0.43              | 0.13              | 0.19              | 0.97              | 0.44              | 0.36              | 0.12   |

Nomenclature in lipid numbers: C<sub>x:y</sub>:x number of carbon atoms in fatty acid chain; y number of double bonds in fatty acid chain

Crude microalgae oil was obtained from Verfahrenstechnik Schwedt GmbH.

**Table S2.** Diameter, dispersion, and concentration of accessible Ni atoms on different materials as determined from XRD, TEM, and hydrogen chemisorption.

| Catalyst          | XRD                    |                   |                                     |
|-------------------|------------------------|-------------------|-------------------------------------|
|                   | Diameter<br>[nm]       | Dispersion<br>[%] | Accessible Nickel atoms<br>[μmol/g] |
| Ni/H-ZSM-5        | 10.5                   | 9.6               | 157                                 |
| Ni/Silicalite 1   | 10.0                   | 10.1              | 174                                 |
| Ni/n-H-ZSM-5      | 3.6                    | 28.0              | 445                                 |
| Ni/n-Silicalite 1 | 2.6                    | 38.8              | 668                                 |
| Catalyst          | TEM                    |                   |                                     |
|                   | Diameter<br>[nm]       | Dispersion<br>[%] | Accessible Nickel atoms<br>[μmol/g] |
| Ni/H-ZSM-5        | 8.8                    | 11.5              | 187                                 |
| Ni/Silicalite 1   | 8.0                    | 12.6              | 218                                 |
| Ni/n-H-ZSM-5      | 2.3                    | 43.7              | 693                                 |
| Ni/n-Silicalite 1 | 2.4                    | 41.9              | 721                                 |
| Catalyst          | Hydrogen chemisorption |                   |                                     |
|                   | Diameter<br>[nm]       | Dispersion<br>[%] | Accessible Nickel atoms<br>[μmol/g] |
| Ni/H-ZSM-5        | 12.9                   | 7.9               | 128                                 |
| Ni/Silicalite 1   | 8.4                    | 12.0              | 207                                 |
| Ni/n-H-ZSM-5      | 4.5                    | 22.0              | 349                                 |
| Ni/n-Silicalite 1 | 4.7                    | 21.5              | 370                                 |

XRD: particle diameters were calculated based on deconvoluted XRD signals for the (111) plane reflection of Ni *via* the Scherrer equation (1), where  $\tau$  is the particle size in Å,  $K$  is the shape factor (0.9 for spherical particles used),  $\beta$  is the line broadening at half the maximum intensity of the reflection  $[2\theta]$  after subtraction of the instrumental line broadening (0.1 for used instrument),  $\lambda$  is the X-Ray wavelength of the used cathode and  $\theta$  is the Bragg angle of the signal.

$$\tau = \frac{K \lambda}{\beta \cos \theta} \quad (1)$$

TEM: Particle diameters were calculated based on at least 300 particles obtained from at least 5 different areas of the catalyst on the carbon grid. The dispersion  $D$  based on the mean particle size was calculated following formula (2), with  $v_{Ni}$  being the volume occupied by a Ni atom ( $10.95 \text{ Å}^3$ ) and  $a_{Ni}$  is the surface area of Nickel atom ( $6.51 \text{ Å}^2$ ) and  $d_{VA}$  is the mean particle size. The concentration of accessible Ni atoms was calculated based on the amount of Ni on the catalyst per gram and the dispersion based on formula (3).

$$D = 6 \frac{(v_{Ni}/a_{Ni})}{d_{VA}} \quad (2)$$

$$c_{\text{accessible Ni atoms}} = D \frac{(m_{Ni}/M_{Ni})}{m_{\text{catalyst}}} \quad (3)$$

## References

- 1 P.Scherrer, *Nachr. Ges. Wiss.*, 1918, **2**, 96.
- 2 G. Ertl, H. Knözinger, J. Weitkamp, *Handbook of Heterogeneous Catalysis*, 2008, **3**, Weinheim, Wiley VCH.

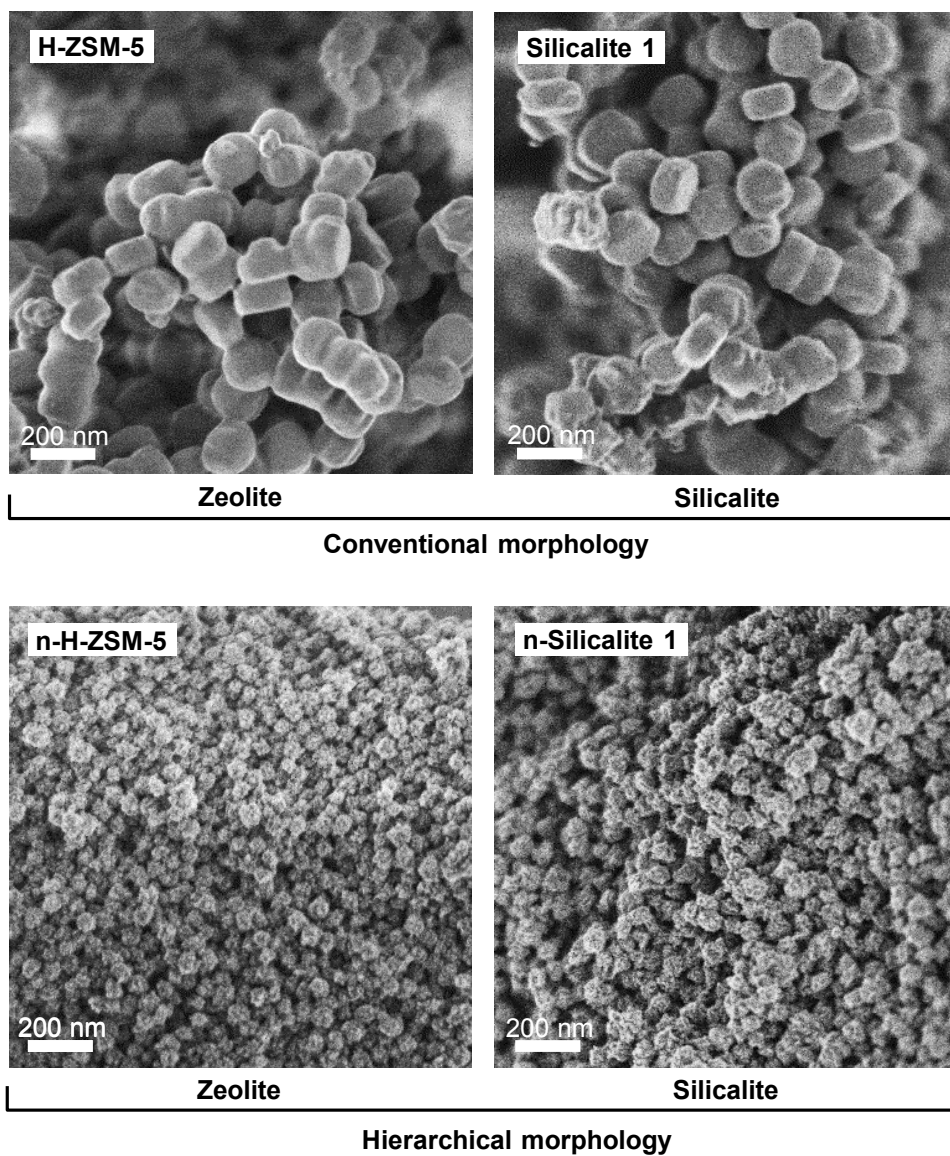

**Figure S1.** Representative micrographs of (n)-H-ZSM-5 and (n)-Silicalite 1 materials.

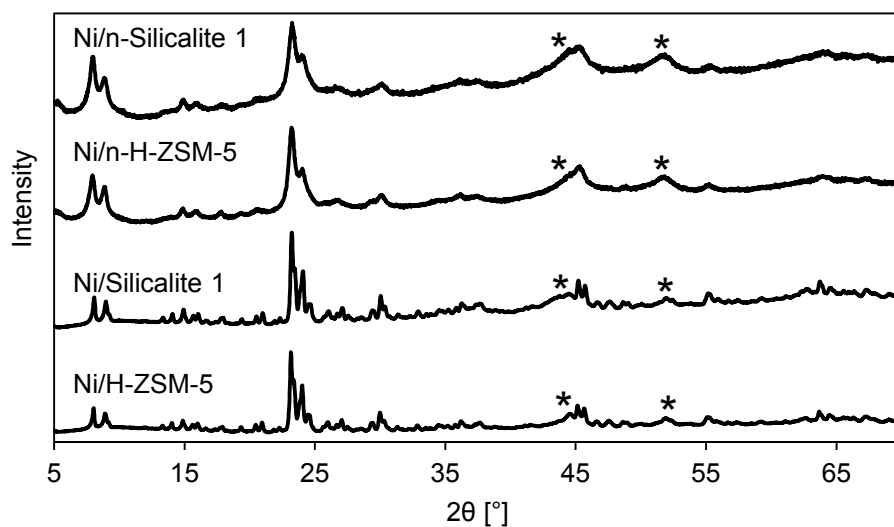

**Figure S2.** X-ray diffractograms of the catalysts based on (n)-H-ZSM-5 and (n)-Silicalite 1 materials. Nickel reflections are highlighted with a star (\*).

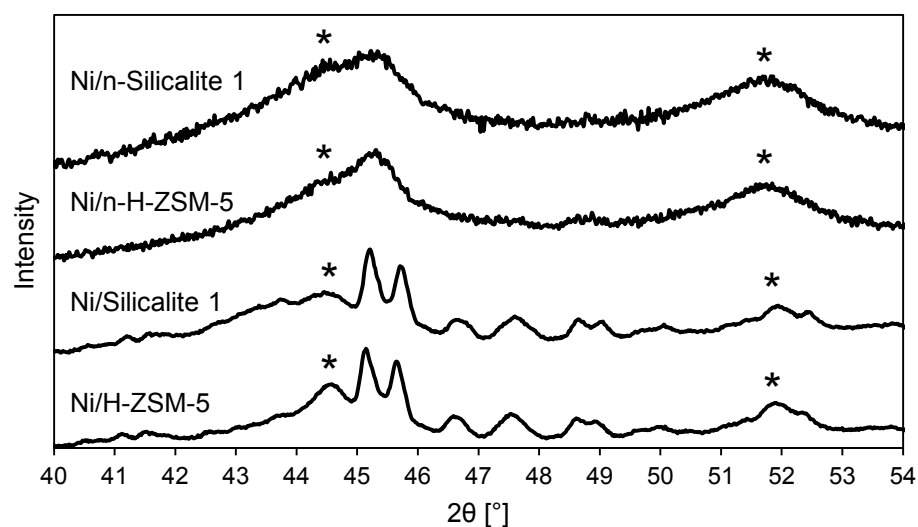

**Figure S3.** Detail of X-ray diffractograms in the region of Ni reflections of the catalysts based on (n)-H-ZSM-5 and (n)-Silicalite 1 materials). Nickel reflections are highlighted with a star (\*).

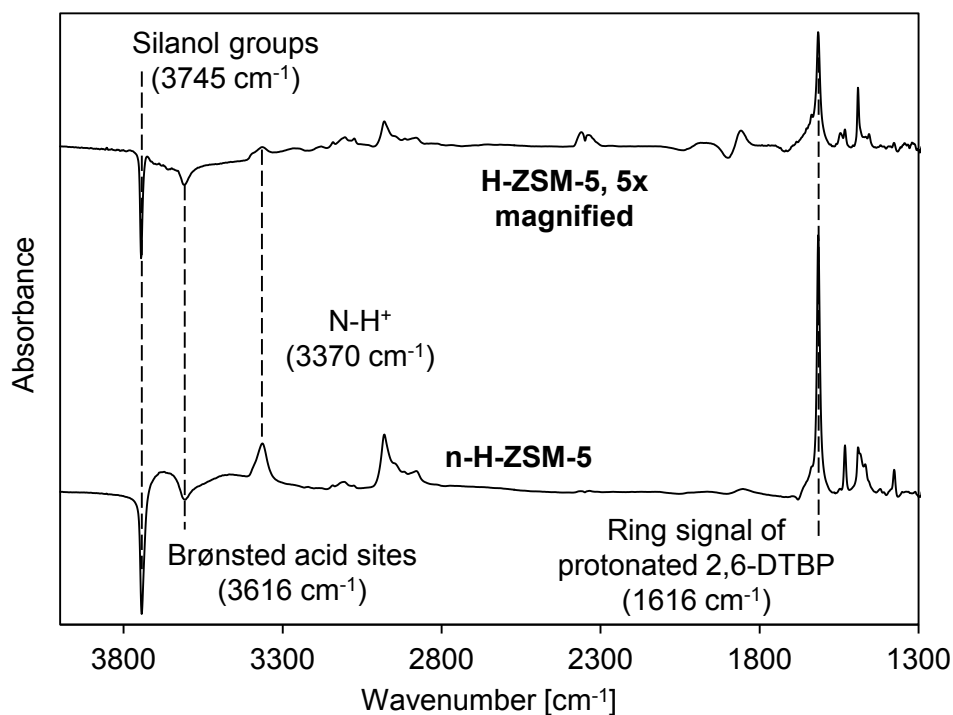

**Figure S4.** Changes in IR spectra after adsorption of 2,6-di-tert-butyl-pyridine (2,6-DTBP) at 423 K, 0.01 kPa and outgassing for 1 h in vacuum. The characteristic bands at 3370  $\text{cm}^{-1}$  ( $\text{N-H}^+$  vibration) and 1616  $\text{cm}^{-1}$  ( $\text{C}=\text{C}$  vibration) appear from 2,6-DTBP interaction with the zeolite.

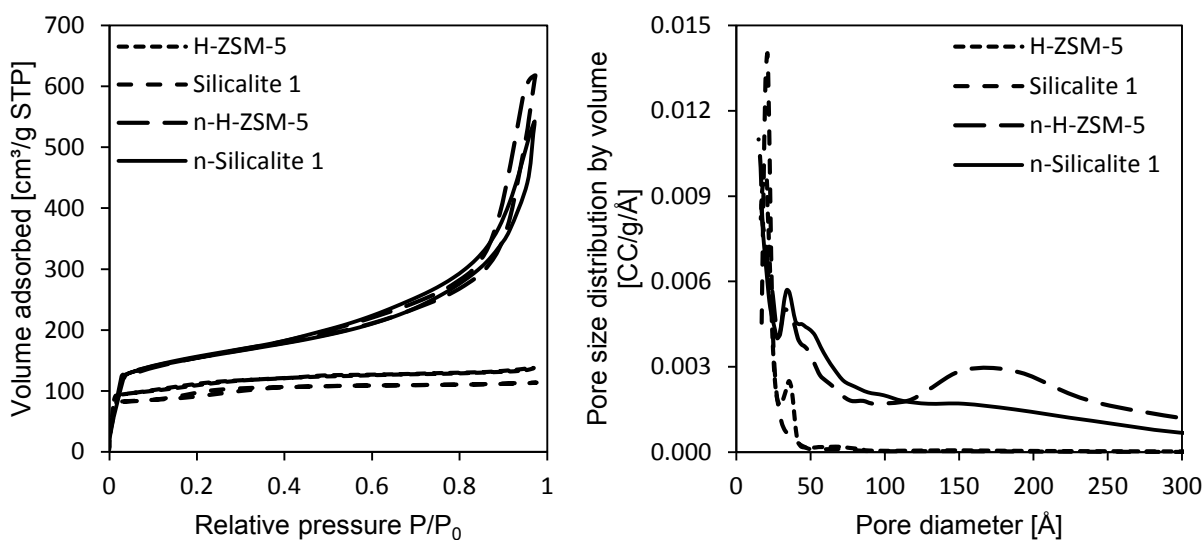

**Figure S5.**  $\text{N}_2$ -physorption isotherms and pore size distributions of unloaded parent materials.

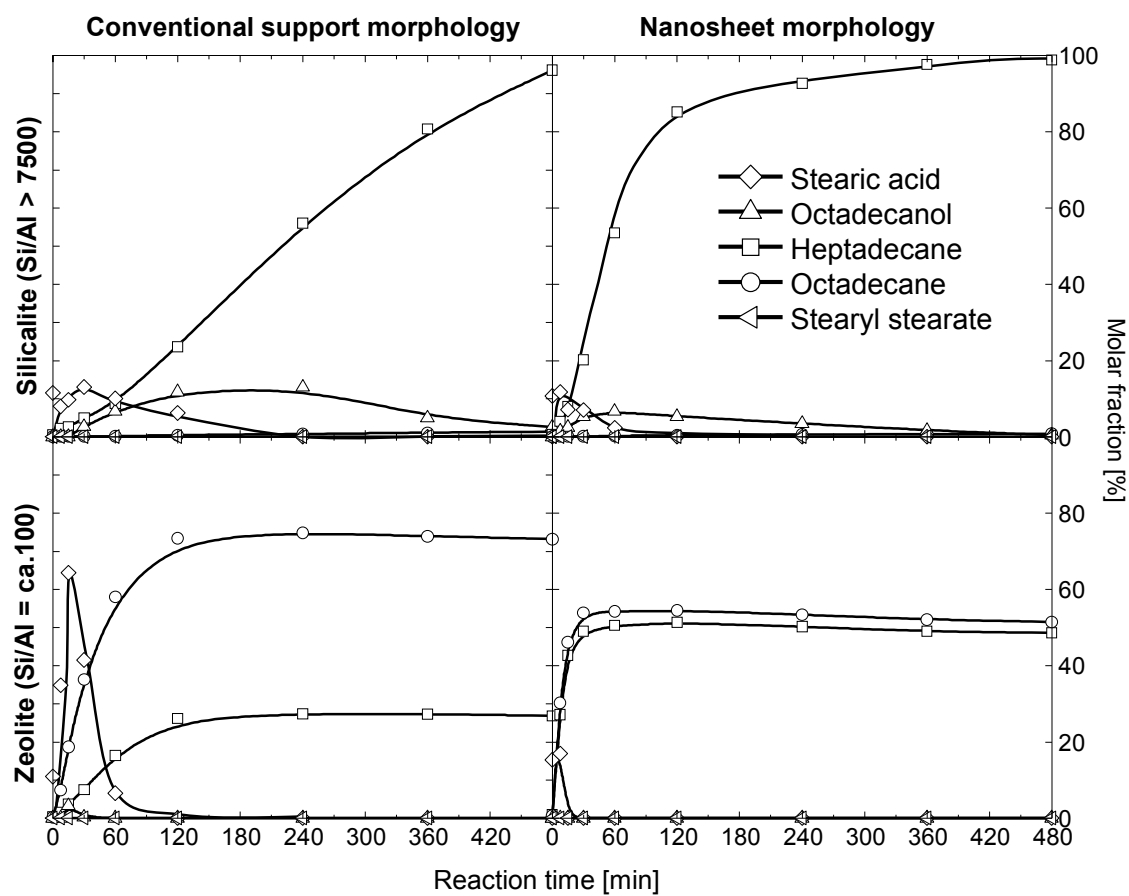

**Figure S6.** Evolution of the concentrations of reaction products of algae oil conversion over time.

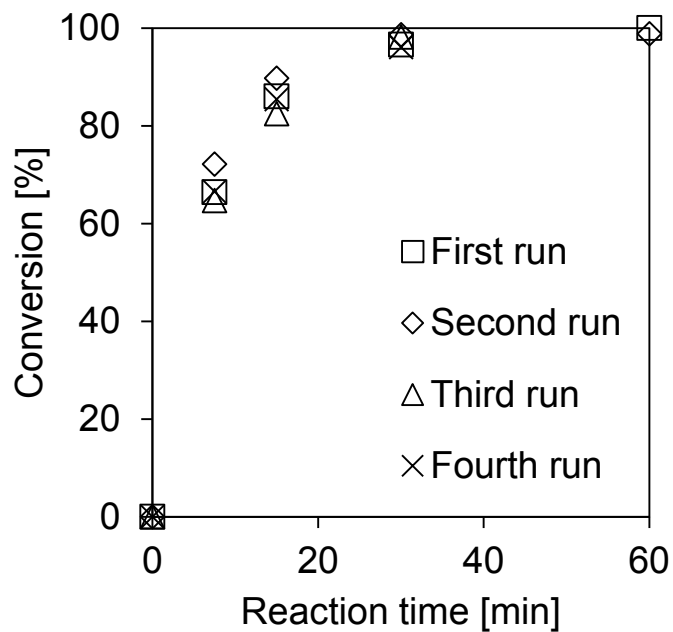

**Figure S7.** Evolution of algae oil conversion over time for four consecutive recycling experiments of Ni/n-H-ZSM-5.

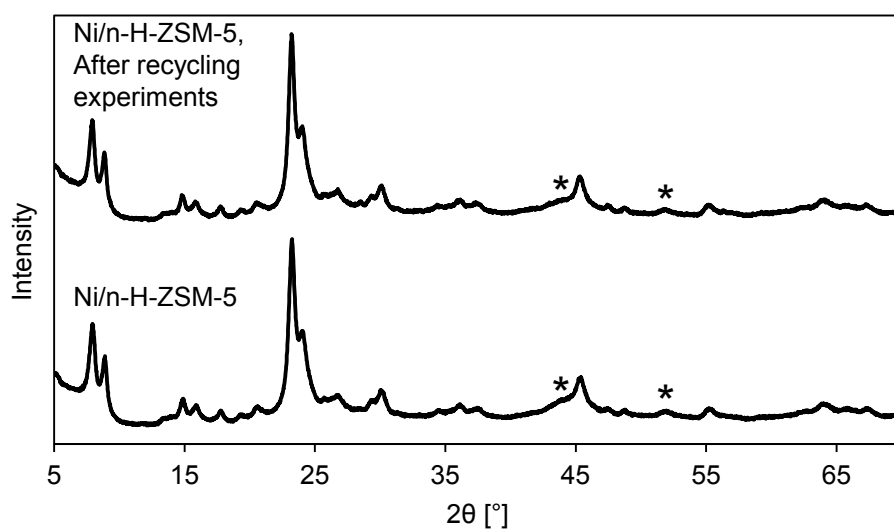

**Figure S8.** X-Ray diffractograms of Ni/n-H-ZSM-5 before and after four consecutive recycling experiments. Nickel reflections are labeled with “\*”.



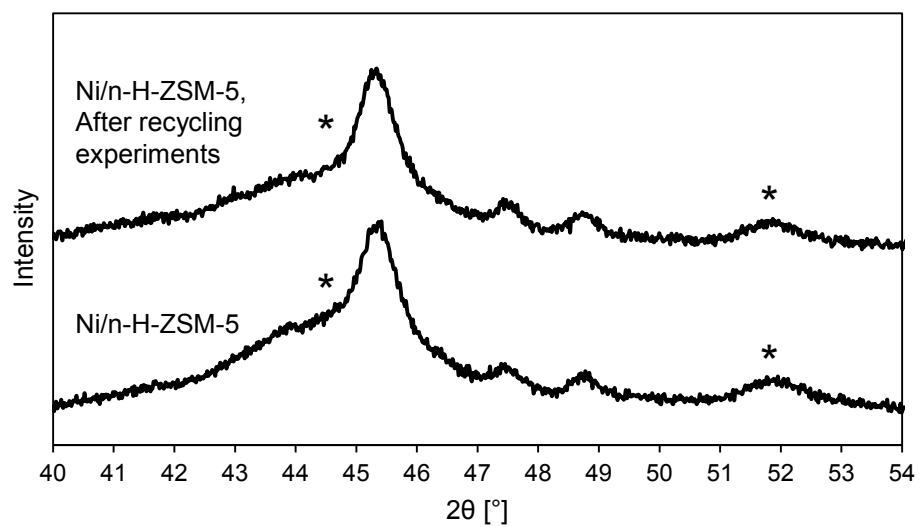

**Figure S9.** X-ray diffractograms of Ni/n-H-ZSM-5 before and after four consecutive recycling experiments. Nickel reflections are labeled with “\*”.
